# Supplementary material for: A Potential Fatty Acid Metabolism-Related Gene Signature for Prognosis in Clear Cell Renal Cell Carcinoma
Source: MDPI journal article supplement (doi:10.3390/cancers14194943), 2022-10-09
Supplement: s1 [file s1]

**Supplementary Table S1.** Sequences of primers used for quantitative real-time polymerase chain reaction (qRT-PCR)

| Gene name | Forward primer          | Reverse primer          |
|-----------|-------------------------|-------------------------|
| ACAA2     | AGACAATGCAGGTAGACGAGC   | ACCCATGATAGAGGGATCACATC |
| ACADL     | TGCAATAGCAATGACAGAGCC   | CGCAACTACAATCACAACATCAC |
| ALDH3A2   | AAACCAGTTAAGAAGAACGTGCT | CGAAGGGGTAATTCCAAGCTC   |
| CPOX      | TGATGATCTTGACTCTCCGTCC  | AGTGCTTTTTTCACAAGGGGAA  |
| CPT2      | GGGGCCTACCTGGTCAATG     | TGGGTAAACGAGTTGAGTTGAAA |
| ENO2      | AGCCTCTACGGGCATCTATGA   | TTCTCAGTCCCATCCAACTCC   |
| ENO3      | TATCGCAATGGGAAGTACGATCT | AAGCTCTTATACAGCTCTCCGA  |
| HPGD      | GCTGGTGGATTGGAATCTTGA   | CCAGGGCAGCTTTTACACTGT   |
| PTPRG     | TGGTGCCTATGGTCCTGAG     | CGCGCATACTGGTCTAAAATGTC |
| TDO2      | AAGGTTGTTTCTCGGATGCAC   | TGTCATCGTCTCCAGAATGGAA  |
