# Supplementary material for: A Potential Fatty Acid Metabolism-Related Gene Signature for Prognosis in Clear Cell Renal Cell Carcinoma
Source: MDPI journal article supplement (doi:10.3390/cancers14194943), 2022-10-09
Supplement: s1 [file s1]

**Supplementary Table S2.** Identified 88 candidate genes by Univariate Cox regression analyses for predicting OS in the TCGA training cohort

| uni_cox_sig_genes | Hazard Ratio(95% CI) | p value     |
|-------------------|----------------------|-------------|
| UROD              | 0.668(0.487_0.916)   | 0.012       |
| CYP4A11           | 0.875(0.828_0.924)   | $p < 0.001$ |
| CYP4A22           | 0.818(0.746_0.898)   | $p < 0.001$ |
| CPT2              | 0.507(0.417_0.617)   | $p < 0.001$ |
| CRYZ              | 0.725(0.645_0.815)   | $p < 0.001$ |
| ACADM             | 0.647(0.568_0.737)   | $p < 0.001$ |
| HAO2              | 0.832(0.778_0.889)   | $p < 0.001$ |
| HMGCS2            | 0.849(0.797_0.905)   | $p < 0.001$ |
| SDHC              | 0.642(0.518_0.796)   | $p < 0.001$ |
| ALDH9A1           | 0.677(0.558_0.821)   | $p < 0.001$ |
| FMO1              | 0.858(0.8_0.919)     | $p < 0.001$ |
| G0S2              | 1.202(1.095_1.32)    | $p < 0.001$ |
| ODC1              | 0.811(0.682_0.966)   | 0.019       |
| HADHB             | 0.581(0.471_0.717)   | $p < 0.001$ |
| RETSAT            | 0.559(0.46_0.68)     | $p < 0.001$ |
| GPD2              | 0.695(0.569_0.848)   | $p < 0.001$ |
| HIBCH             | 0.52(0.428_0.632)    | $p < 0.001$ |
| ACADL             | 0.732(0.667_0.803)   | $p < 0.001$ |
| ACAA1             | 0.639(0.505_0.81)    | $p < 0.001$ |
| PTPRG             | 0.598(0.513_0.697)   | $p < 0.001$ |
| CPOX              | 1.363(1.036_1.794)   | 0.027       |
| MGLL              | 0.754(0.619_0.92)    | 0.005       |
| EHHADH            | 0.728(0.662_0.801)   | $p < 0.001$ |
| HSD17B11          | 0.8(0.678_0.945)     | 0.009       |
| RAP1GDS1          | 0.537(0.408_0.706)   | $p < 0.001$ |
| METAP1            | 0.566(0.444_0.721)   | $p < 0.001$ |
| TDO2              | 1.286(1.121_1.476)   | $p < 0.001$ |
| ETFDH             | 0.507(0.411_0.626)   | $p < 0.001$ |
| HPGD              | 0.774(0.684_0.877)   | $p < 0.001$ |
| ACSL1             | 0.691(0.601_0.795)   | $p < 0.001$ |
| SDHA              | 0.655(0.525_0.816)   | $p < 0.001$ |
| HMGCS1            | 0.676(0.567_0.806)   | $p < 0.001$ |
| HSD17B4           | 0.635(0.516_0.782)   | $p < 0.001$ |
| SLC22A5           | 0.705(0.602_0.824)   | $p < 0.001$ |
| LTC4S             | 0.409(0.179_0.932)   | 0.033       |
| BPHL              | 0.569(0.465_0.695)   | $p < 0.001$ |
| ECI2              | 0.49(0.386_0.621)    | $p < 0.001$ |
| BCKDHB            | 0.705(0.584_0.852)   | $p < 0.001$ |
| SERINC1           | 0.686(0.598_0.787)   | $p < 0.001$ |
| INMT              | 0.793(0.702_0.896)   | $p < 0.001$ |

|           |                    |             |
|-----------|--------------------|-------------|
| BLVRA     | 0.742(0.582_0.945) | 0.016       |
| CD36      | 0.841(0.761_0.93)  | $p < 0.001$ |
| DLD       | 0.653(0.537_0.793) | $p < 0.001$ |
| HCCS      | 0.599(0.459_0.782) | $p < 0.001$ |
| MAOA      | 0.832(0.75_0.922)  | $p < 0.001$ |
| CA2       | 0.72(0.635_0.816)  | $p < 0.001$ |
| NBN       | 0.784(0.652_0.943) | 0.01        |
| AQP7      | 0.816(0.717_0.93)  | 0.002       |
| ALDH1A1   | 0.791(0.72_0.87)   | $p < 0.001$ |
| AUH       | 0.56(0.47_0.668)   | $p < 0.001$ |
| HSDL2     | 0.548(0.449_0.668) | $p < 0.001$ |
| ALAD      | 0.582(0.479_0.707) | $p < 0.001$ |
| CEL       | 1.217(1.05_1.412)  | 0.009       |
| LDHA      | 0.828(0.696_0.985) | 0.034       |
| CPT1A     | 0.621(0.525_0.734) | $p < 0.001$ |
| SDHD      | 0.636(0.525_0.77)  | $p < 0.001$ |
| IDI1      | 0.597(0.487_0.733) | $p < 0.001$ |
| GAD2      | 2.987(1.367_6.526) | 0.006       |
| ACSL5     | 0.829(0.708_0.97)  | 0.02        |
| ECHS1     | 0.702(0.54_0.912)  | 0.008       |
| ADIPOR2   | 0.727(0.555_0.954) | 0.021       |
| ENO2      | 1.182(1.027_1.361) | 0.019       |
| GABARAPL1 | 0.754(0.622_0.913) | 0.004       |
| ACADS     | 0.699(0.582_0.84)  | $p < 0.001$ |
| SUCLA2    | 0.6(0.511_0.705)   | $p < 0.001$ |
| APEX1     | 0.673(0.527_0.858) | 0.001       |
| PSME1     | 0.566(0.408_0.783) | $p < 0.001$ |
| RDH11     | 0.642(0.503_0.818) | $p < 0.001$ |
| ACOT2     | 0.733(0.59_0.91)   | 0.005       |
| DLST      | 0.641(0.516_0.796) | $p < 0.001$ |
| ACSM3     | 0.749(0.641_0.875) | $p < 0.001$ |
| MLYCD     | 0.639(0.518_0.789) | $p < 0.001$ |
| ENO3      | 1.356(1.164_1.579) | $p < 0.001$ |
| ALDH3A2   | 0.618(0.536_0.713) | $p < 0.001$ |
| CA4       | 0.784(0.713_0.862) | $p < 0.001$ |
| ACOX1     | 0.526(0.41_0.675)  | $p < 0.001$ |
| ACAA2     | 0.615(0.534_0.707) | $p < 0.001$ |
| IDH3B     | 0.535(0.382_0.751) | $p < 0.001$ |
| ACSS1     | 0.744(0.609_0.909) | 0.004       |
| TP53INP2  | 0.521(0.424_0.64)  | $p < 0.001$ |
| GCDH      | 0.605(0.437_0.838) | 0.003       |
| ECH1      | 0.782(0.65_0.941)  | 0.009       |
| YWHAH     | 0.698(0.544_0.897) | 0.005       |

|        |                    |             |
|--------|--------------------|-------------|
| LGALS1 | 1.476(1.242_1.754) | $p < 0.001$ |
| ACO2   | 0.665(0.581_0.762) | $p < 0.001$ |
| PPARA  | 0.6(0.494_0.73)    | $p < 0.001$ |
| CBR1   | 0.723(0.55_0.95)   | 0.02        |
| CBR3   | 1.198(1.014_1.417) | 0.034       |

---

Abbreviations: OS: Overall survival; TCGA: The Cancer Genome Atlas; CI: Confidence interval.

$p$  values less than 0.05 were considered to be statistically significant.
